# Supplementary material
Source: PubMed Central journal article supplement (PMC4092013)
Supplement: NIHMS593892-supplement-01.pdf [file NIHMS593892-supplement-01.pdf]

## Supplementary Information

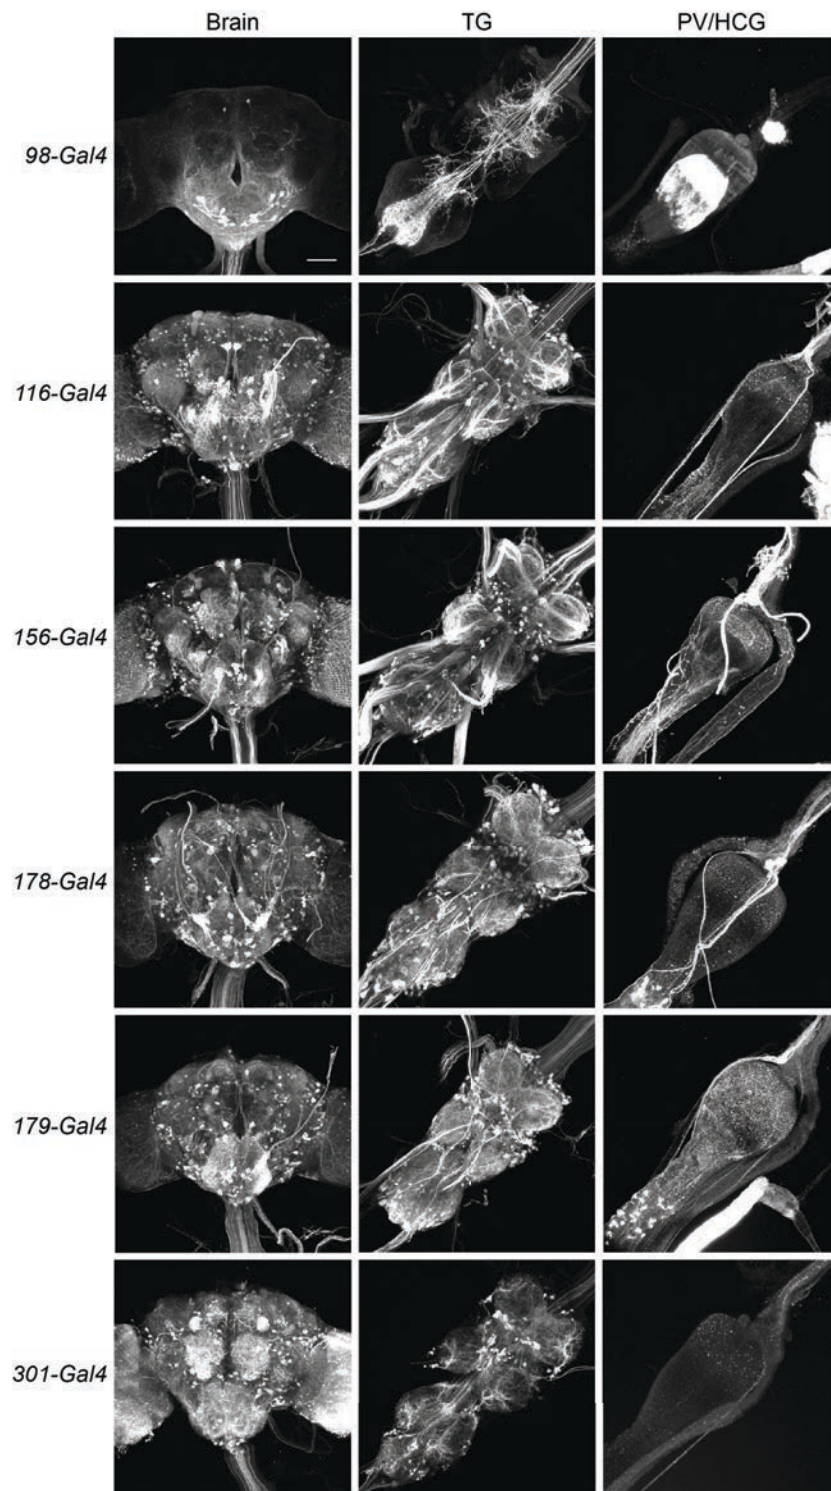

**Figure S1: Expression pattern of Gal4 lines with an overconsumption phenotype, related to Figure 1.** Expression in brain, ventral nerve cord (VNC) and proventriculus (PV, 98-Gal4) or hypocerebral ganglion (HG, other lines) is shown for Gal4 lines expressing *UAS-CD8:GFP*. Scale is 50  $\mu$ m.

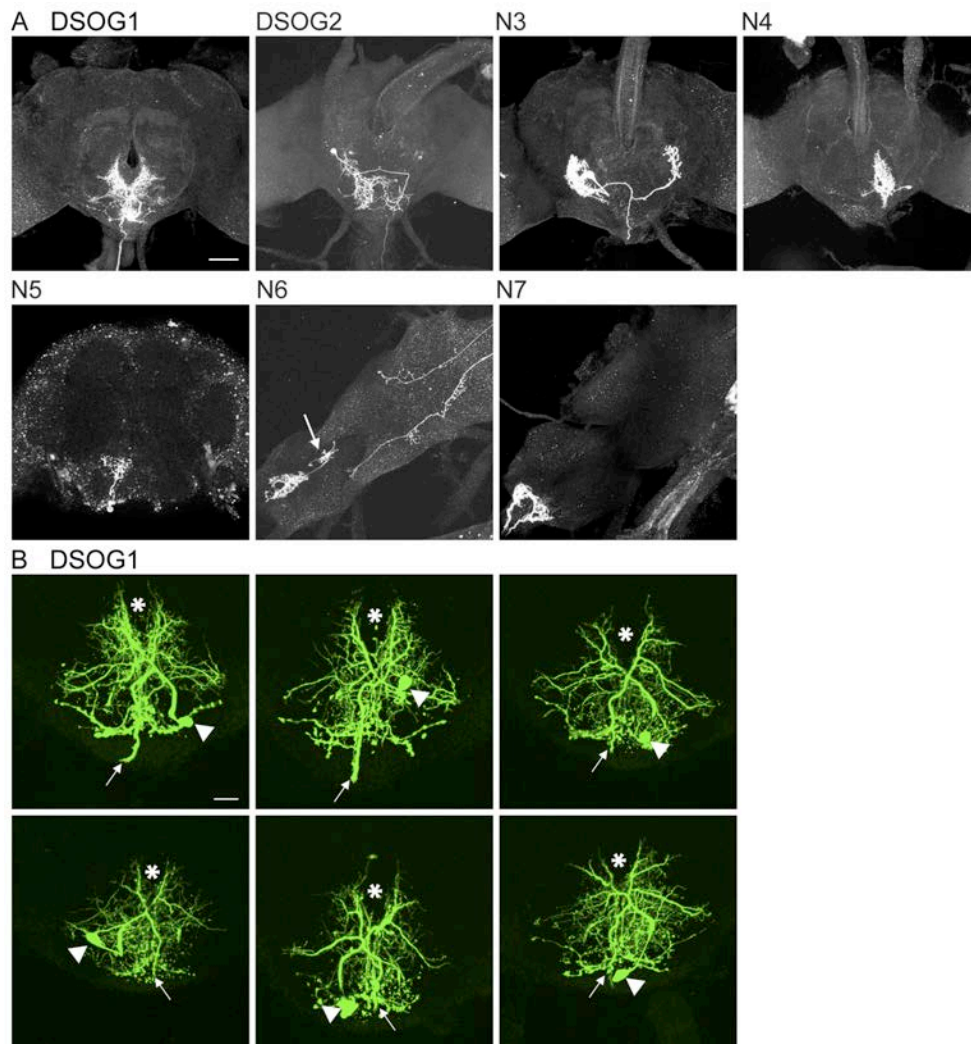

**Figure S2: Different cell-types in the *98-Gal4* line and similarity of DSOG1 cells, related to Figure 2.** A. Single cell clones for the seven cell-types identified in mosaic animals (flies contained *hs-FLP, tub>Gal80>, 98-Gal4, UAS-GFP, UAS-Kir2.1*). N6 and N7 are located in the ventral nerve cord, other neurons are localized in the brain. Scale is 50  $\mu\text{m}$ . B. The DSOG1 cell cluster is comprised of morphologically indistinguishable neurons. Anatomical diversity among DSOG1 neurons was explored by photoconverting photo-activatable GFP (pa-GFP) by 2-photon microscopy to visualize single DSOG1 cells. Flies were *tub>Gal80>; 98-Gal4/276B-FLP; UAS-C3PA-GFP* 6 individual photoactivated DSOG1 cells. All 6 cells were characterized by a large cell body (arrow head) that sends widely arborizing projections throughout the SOG, with characteristic innervation around the oesophageal passage (asterisk), and a descending projection on the contralateral side of the cell body (arrow). Scale: 20  $\mu\text{m}$ .

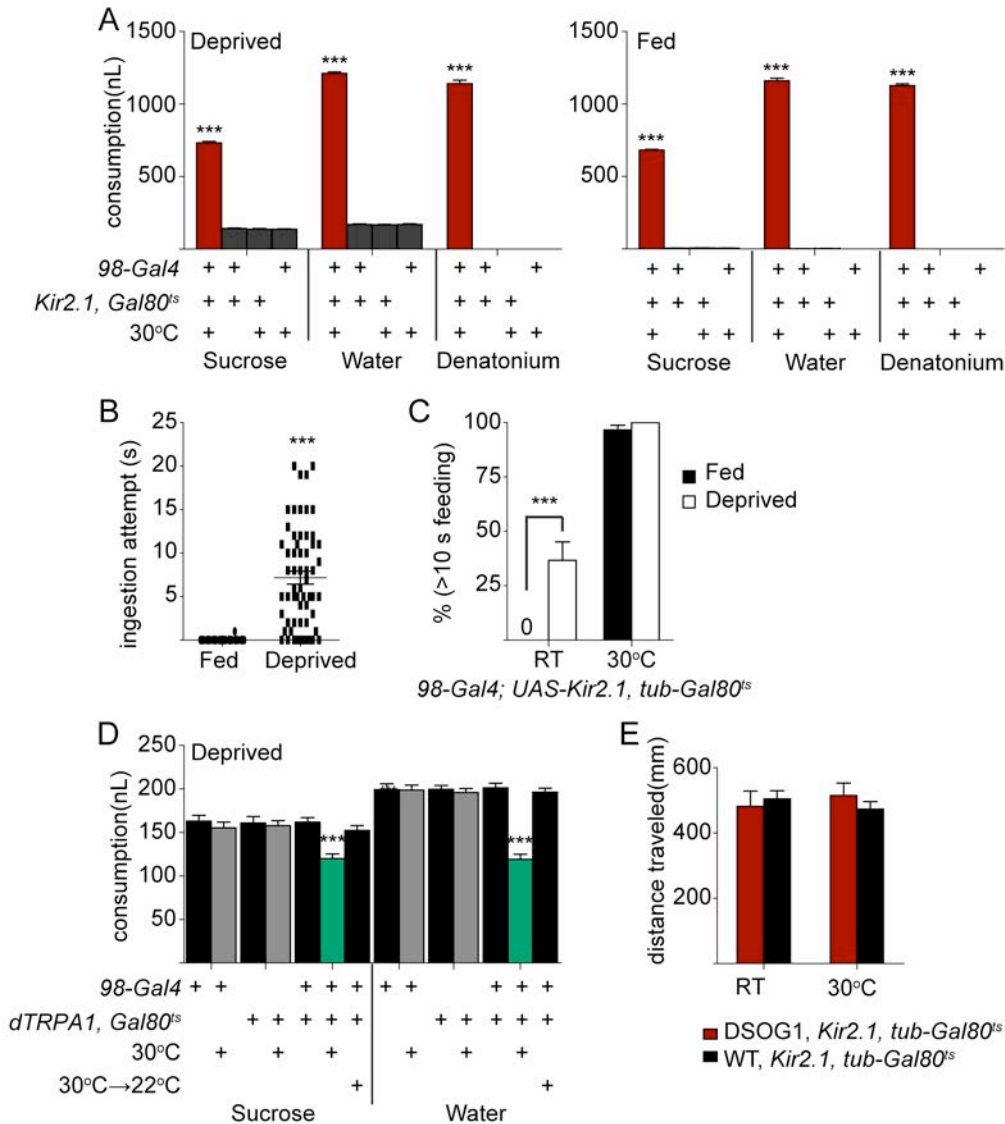

**Figure S3: Feeding intake and locomotion phenotypes for flies with altered DSOG1 activity, related to Figure 3.** A. Conditional inactivation of *98-Gal4* neurons with *Kir2.1* increased volume consumed in deprived (24 hr food-deprived) and fed (non-deprived) conditions. *98-Gal4, 276-FLP, tub>Gal80>, tub-Gal80<sup>ts</sup>, UAS-Kir2.1* flies were shifted to 30°C for 2 days for *Kir2.1* induction or remained at 22°C for non-induced controls. n=20; mean +/- SEM; one-way ANOVA, Tukey post-hoc, \*\*\*p<0.001. B. Dry food feeding attempts on crystallized sucrose measured in pumping time. n=60 isoD1 flies/condition. Student's t test, \*\*\* p < 0.001. C. Inactivation of DSOG1 neurons leads to persistent feeding attempts on dry food regardless of feeding state. Genotype *98-Gal4; UAS-Kir2.1, tub-Gal80<sup>ts</sup>*, n= 60/condition. Student's t test, \*\*\* p < 0.001. D. Heat-induced *dTRPA1* activation of DSOG1 neurons (*98-Gal4, 276-FLP, tub>Gal80>, UAS-dTRPA1*) reduced consumption volume for sucrose and water. n=30; mean +/- SEM; one-way ANOVA, Tukey post-hoc, \*\*\*p<0.001. E. DSOG1 inactivation in *tub>Gal80>; 98-Gal4/276B-FLP; UAS-Kir2.1, Gal80<sup>ts</sup>* does not change baseline locomotion as compared to genetic (*tub>Gal80>; +/276B-FLP; UAS-Kir2.1, Gal80<sup>ts</sup>*) and temperature controls. n = 10 flies/condition. Two-way ANOVA NS.

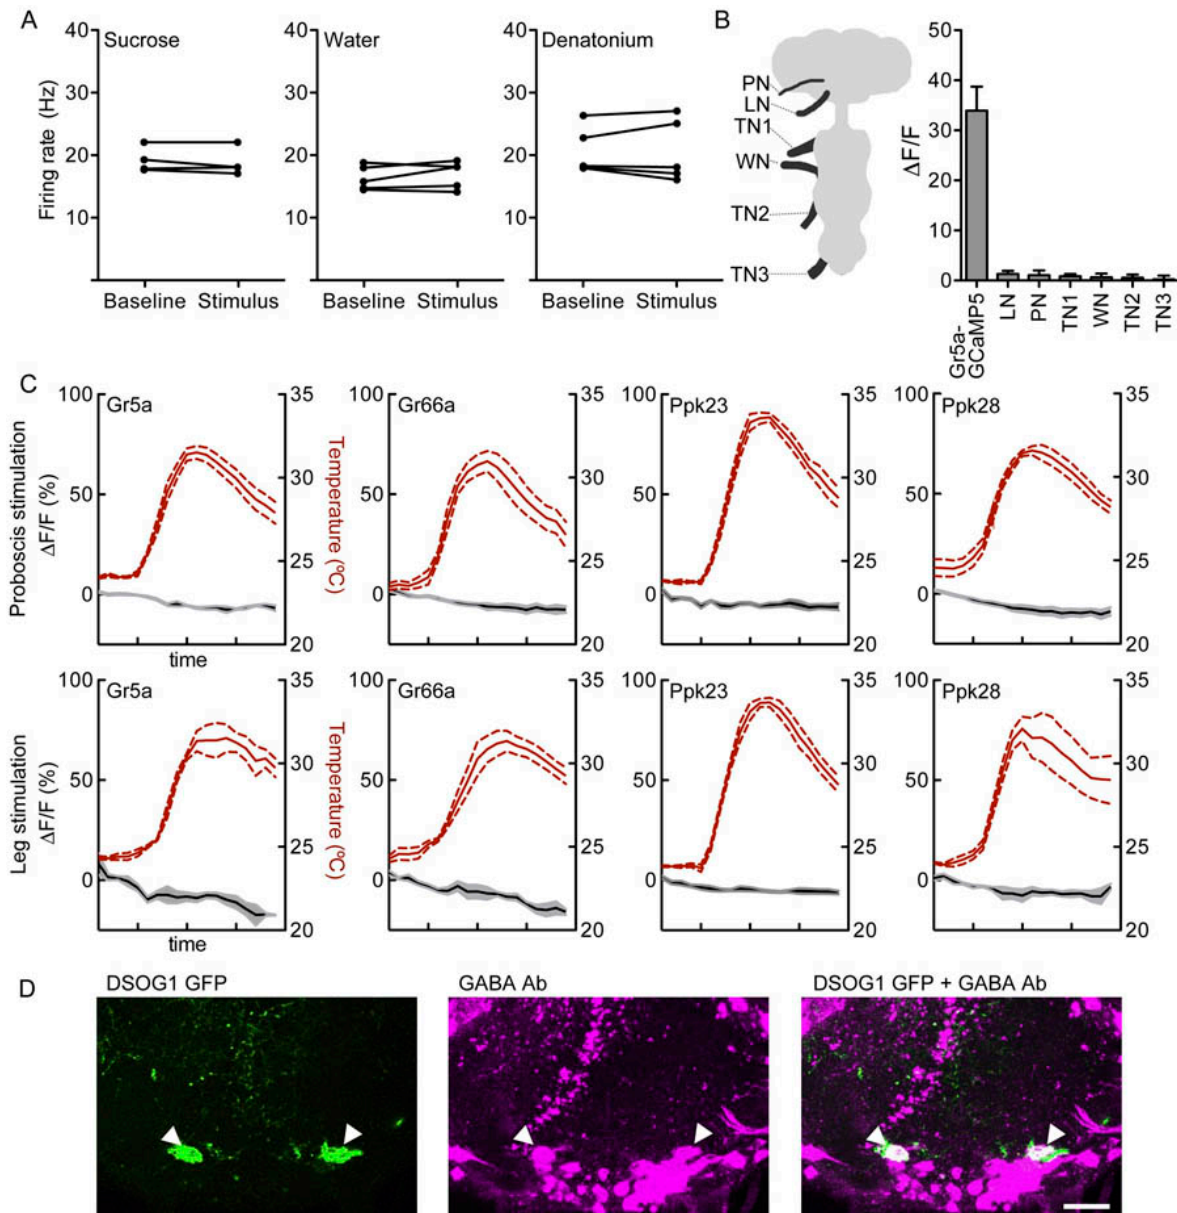

**Figure S4: DSOG1 neurons do not respond to taste stimuli, related to Figure 5.** A. DSOG1 firing rate before (Baseline) and during 1s stimulation (Stimulus) with 1M sucrose, water or 1mM denatonium in deprived conditions (24 hrs food deprivation). Baseline rate was averaged 10s pre-stimulus.  $n=4-5$  flies, Wilcoxon matched pairs test. B. Brain plus nerve cord schematic showing nerves stimulated: Pharyngeal nerve (PN), Labellar Nerve (LN), Thoracic Nerve segment 1-3 (TN1, TN2, TN3), Wing Nerve (WN). Nerve stimulation (10V) activated Gr5a sugar-sensing sensory projections but did not activate DSOG1 by GCaMP fluorescence changes.  $n=6-8$  flies/condition, mean $\pm$ SEM, ANOVA with Tukey post-hoc test. C. Flies expressing the heat-activated dTRPA1 ion channel in different sensory classes were stimulated with a heat probe (temperature marked in red) and GCaMP fluorescence of DSOG1 was monitored (gray lines). LexA/lexAop system was used for dTRPA1 expression and Gal4/UAS system was used for GCaMP expression in DSOG1. D. Anti-GABA immunostaining shows co-expression of DSOG1 (green) and GABA (magenta). Scale is 20  $\mu$ m.

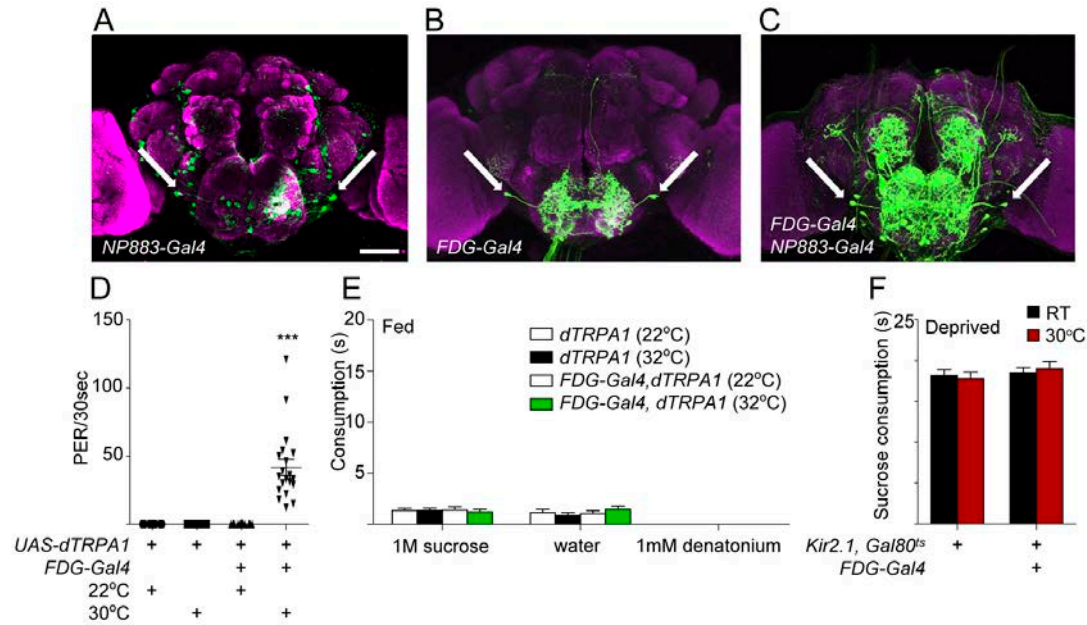

**Figure S5: FDG, a putative feeding command neuron, controls meal initiation but not consumption, related to Figure 6.** A. *NP883-Gal4* line that was previously reported to label a putative feeding command neuron FDG (arrows). Scalebar 50  $\mu$ m. B. *FDG-Gal4* - FDG neuron selective line identified in the FlyLight collection (*Gmr81e10*). C. *NP883-Gal4*, *FDG-Gal4* co-immunostain showing a single FDG neuron labeled, suggesting that both lines label the FDG neuron. D. Thermogenetic activation of neurons labeled by *FDG-Gal4* leads to spontaneous proboscis extensions (similar to *NP833-Gal4*, see Figure 5B), suggesting that it is an interneuron for proboscis extension. E. Thermogenetic activation of neurons labeled by *FDG-Gal4* does not induce consumption of appetitive nor aversive substances suggesting that the FDG neuron does not function as a feeding command neuron. F. Inactivation of the *FDG-Gal4* does not reduce post-starvation consumption of 1M sucrose (Two-way ANOVA, NS).

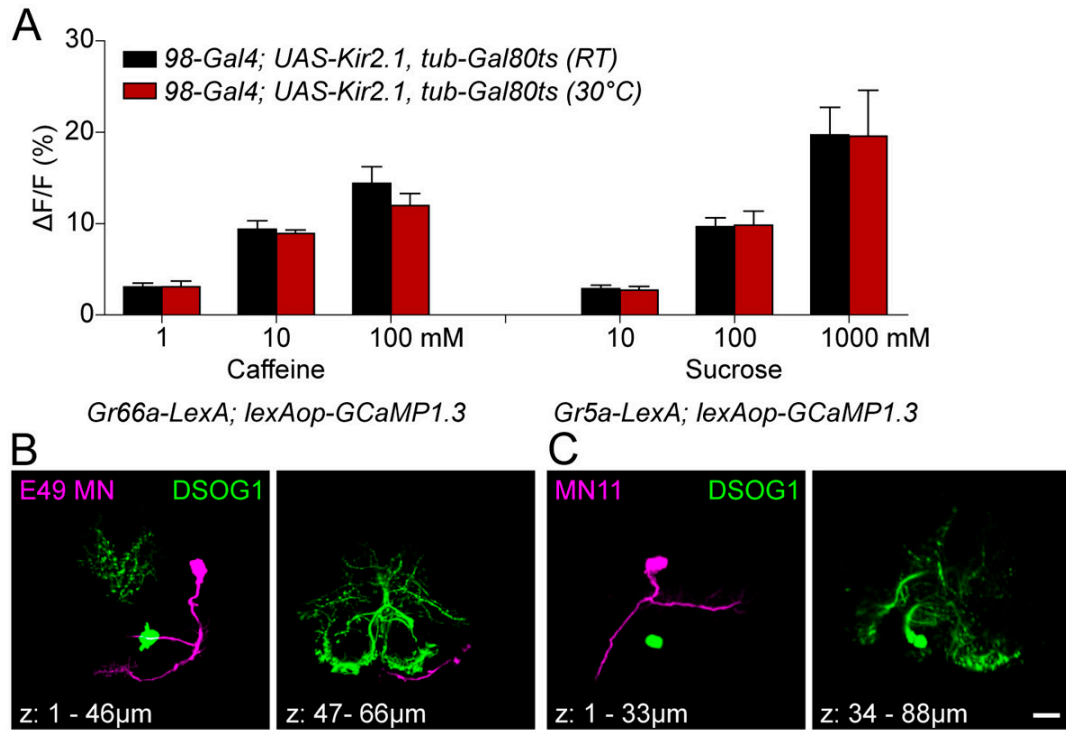

**Figure S6: Sensory responses are not affected upon DSOG1 silencing, related to Figure 8.**  
 A. The response of Gr66a, bitter-sensing cells to 1, 10, 100 mM caffeine was monitored in flies with (RT) or without 98-Gal4 neural activity (30°C) (left) using GCaMP calcium imaging. *lexAop-GCaMP1.3* was used to monitor calcium changes and *UAS-Kir2.1, tub-Gal80<sup>ts</sup>* was used for conditional inactivation of 98-Gal4 cells. The response of Gr5a, sugar-sensing cells to 10, 100 and 1000 mM sucrose was also monitored (right). Responses with or without 98-Gal4 neural silencing were not statistically different. n=3-5; mean± SEM; t-test, NS. B. DSOG1 (green, pa-GFP) and E49 motor neuron (magenta, pa-GFP) project to non-overlapping compartments in the SEZ neuropil. Genotype: *98-Gal4/E49-Gal4; UAS-C3PA:GFP*. C. DSOG1 (green, pa-GFP) and MN11 motorneuron (magenta, pa-GFP) project to non-overlapping compartments in the SEZ. Genotype: *98-Gal4/UAS-C3PA:GFP; NP534-Gal4/UAS-C3PA:GFP*. Scalebar: 20 μm.

## **Supplemental Videos**

**Supplemental Video 1:** This movie shows the water consumption of a wild-type, water-deprived fly. Blue dye tracer is used to monitor water uptake (Quicktime; 6.7 MB).

**Supplemental Video 2:** This movie shows the water consumption of a *98-Gal4* fly conditionally expressing Kir2.1 under water-deprived conditions. Blue dye is included for visualization purposes (Quicktime; 28.9 MB).

**Supplemental Video 3:** This movie shows a three dimensional visualization of DSOG1 neurons. DSOG1 is labeled with CD8-GFP (green), nervous system is labeled with nc82 (purple). Genotype is *98-Gal4, 276B-FLP, tub>Gal80>, UAS-CD8:GFP* (Quicktime; 23.9 MB).
